# Supplementary material for: Investigating the potential of hydroxyethylamino-di(methylene phosphonic acid) in inhibiting gypsum crystallization
Source: Royal Society of Chemistry journal article supplement (doi:10.1039/d2ce01156e), 2022-12-22
Supplement: d2ce01156e1.pdf [file d2ce01156e1.pdf]

## Investigating the potential of hydroxyethylamino-di(methylene phosphonic acid) in inhibiting gypsum crystallization

Taher Rabizadeh<sup>1</sup>

1- Department of Materials Engineering, Faculty of Mechanical Engineering, University of Tabriz, 51666-16471, Tabriz, Iran

\* Correspondence to: Taher Rabizadeh (t.rabizadeh@tabrizu.ac.ir)

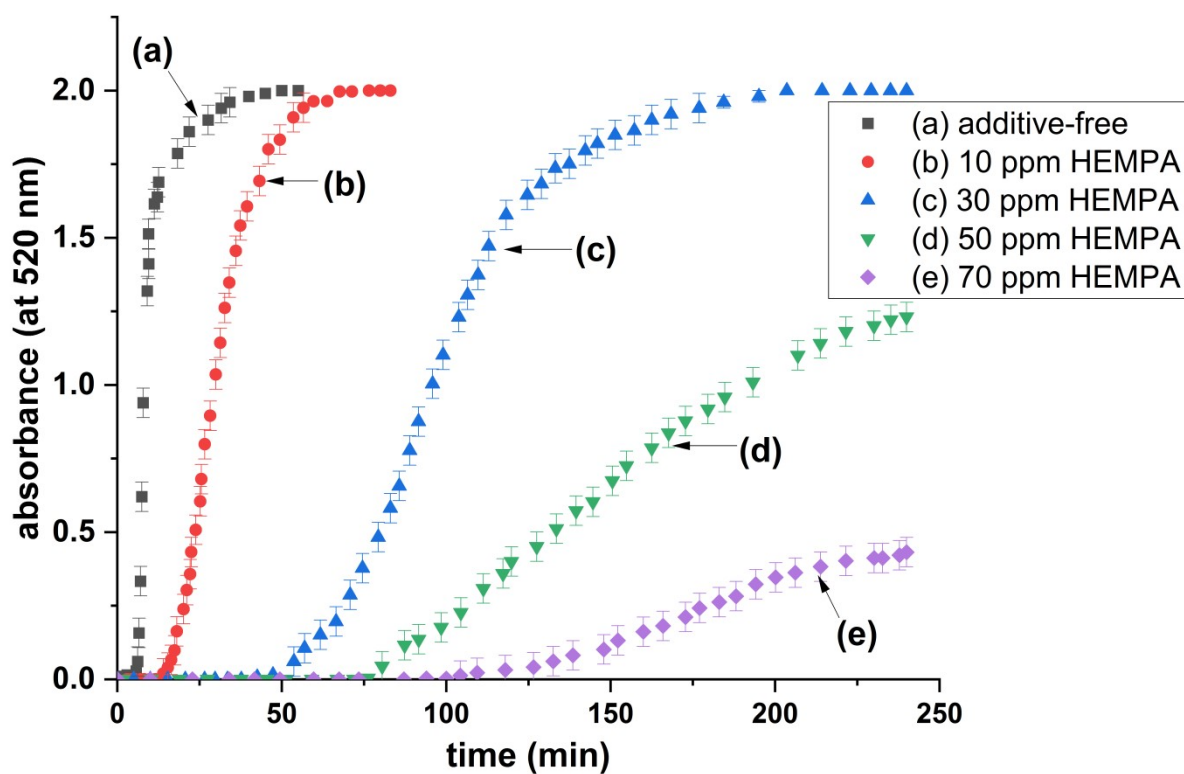

**Fig. S1.** Absorbance vs. time plots obtained in the absence and presence of different concentrations of HEMPA at pH ~ 4.

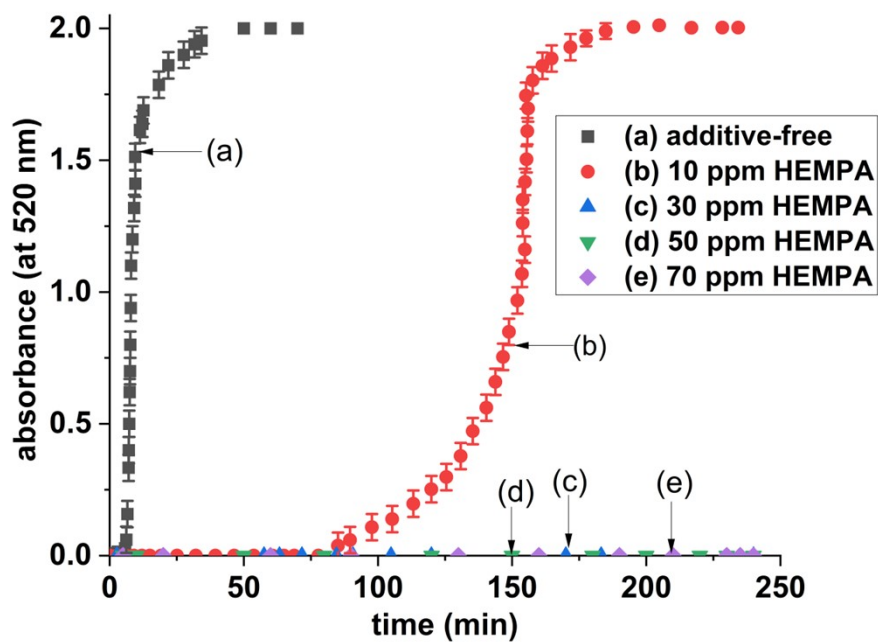

**Fig. S2.** Absorbance vs. time plots obtained in the absence and presence of different concentrations of HEMPA at pH ~ 7.

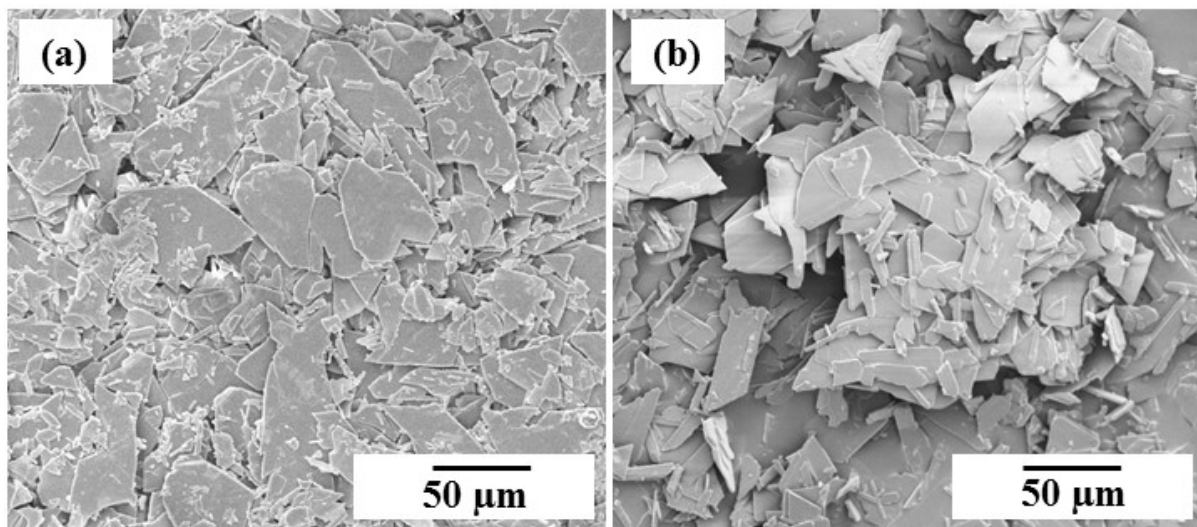

**Fig. S3.** SEM images of gypsum final products obtained from (a) additive-free at pH ~ 4; (a) additive-free at pH ~ 7;

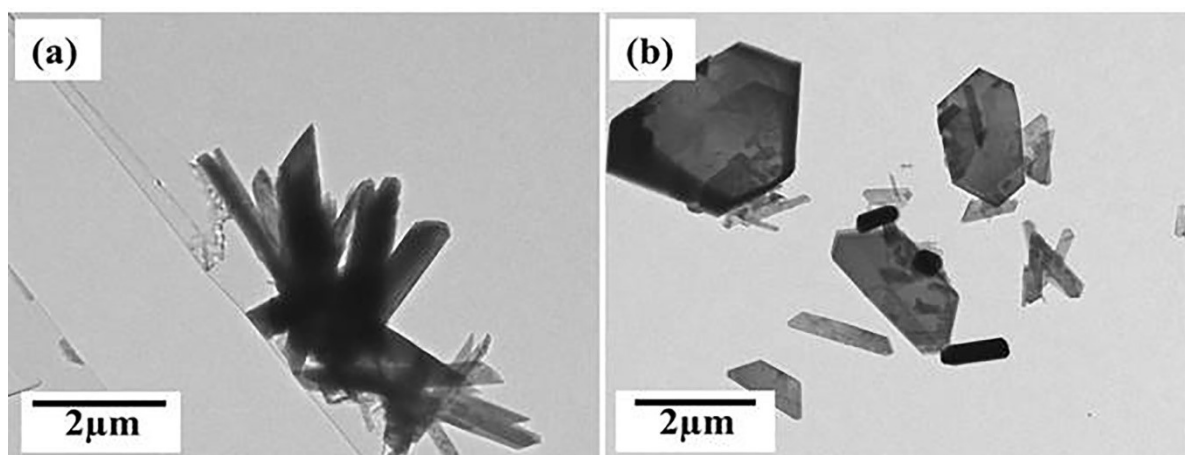

**Fig. S4** HR-TEM micrograph of gypsum crystals gathered after 240 min from (a) additive-free; (b) 30 ppm HEMPA containing solutions (at pH ~ 4)

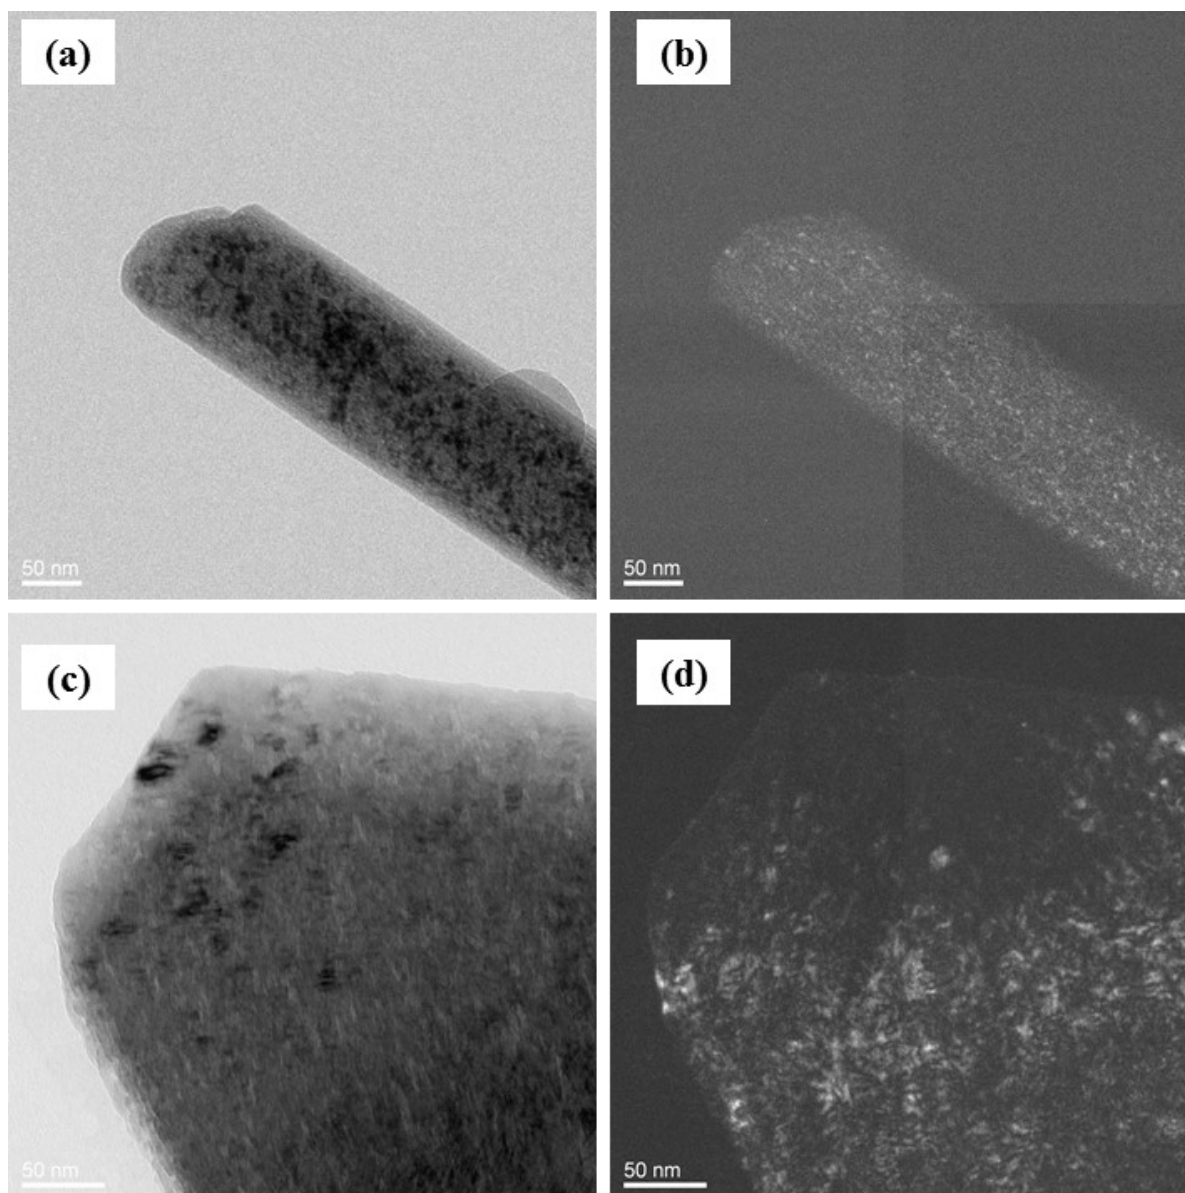

**Fig. S5** HR-TEM micrograph of gypsum crystals gathered after 240 min; (a) bright-field image from a crystal produced without HEMPA (at pH ~ 4); (b) dark-field image from a crystal produced without HEMPA (at pH ~ 4); (c) bright-field image from a crystal produced with 30 ppm HEMPA (at pH ~ 4); (d) dark-field images from a crystal produced with 30 ppm HEMPA (at pH ~ 4).
